# Supplementary material for: Genomics of parallel adaptation at two timescales in Drosophila
Source: PubMed Central journal article supplement (PMC5638604; doi:10.1371/journal.pgen.1007016), 2017-10-02

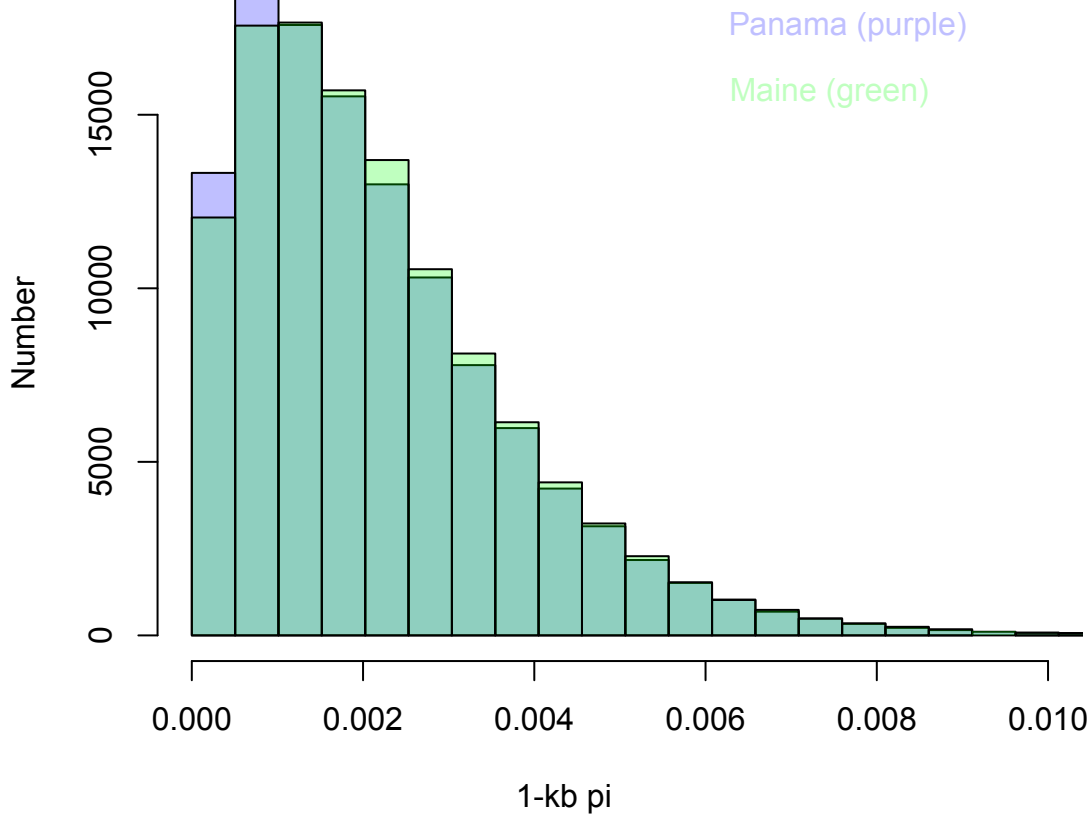

Supplement: pgen.1007016.s001.pdf [file pgen.1007016.s001.pdf]
