# Supplementary material for: Genomics of parallel adaptation at two timescales in Drosophila
Source: PubMed Central journal article supplement (PMC5638604; doi:10.1371/journal.pgen.1007016), 2017-10-02
Supplement: pgen.1007016.s002.pdf [file pgen.1007016.s002.pdf]

Number of Kmers

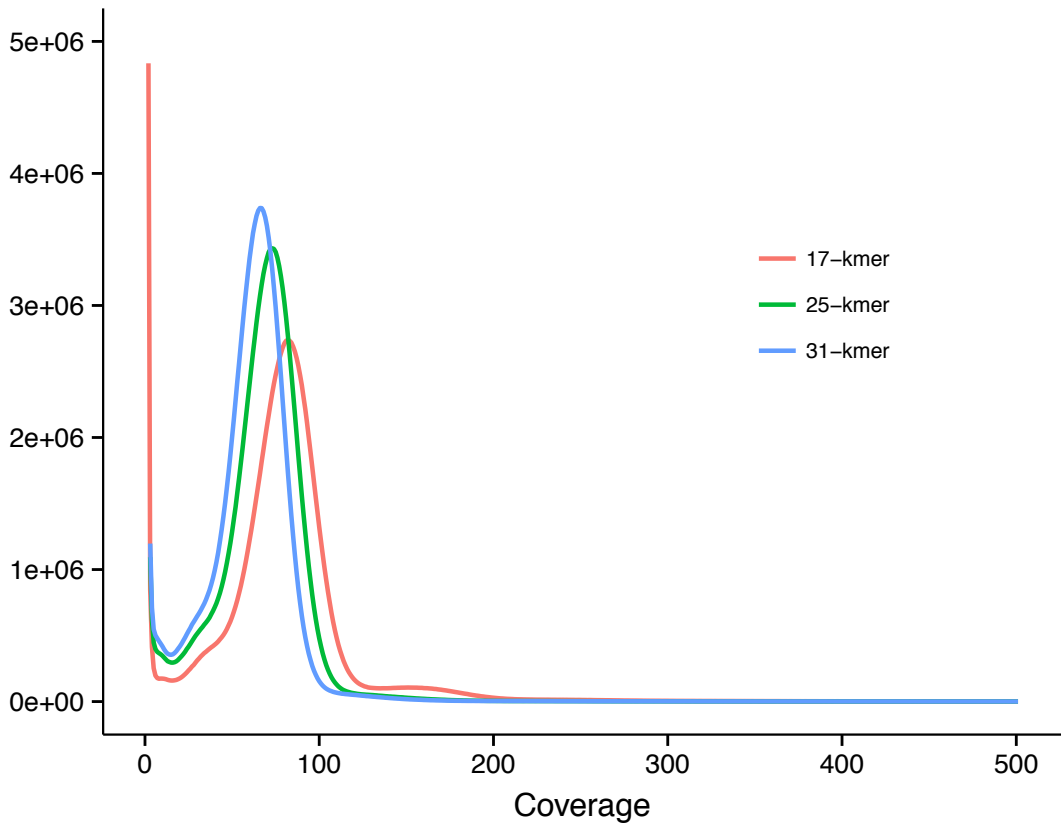

17-kmer

25-kmer

31-kmer

Coverage
