# Supplementary material for: Genomics of parallel adaptation at two timescales in Drosophila
Source: PLoS Genet. 2017 Oct 2;13(10):e1007016. doi: 10.1371/journal.pgen.1007016 (PMC5638604; doi:10.1371/journal.pgen.1007016)
Supplement: S12 Table — (XLSX) [file pgen.1007016.s014.xlsx]

## Sheet: Caption
Table S12. D. hydei genes with significant MK test, and their tissue expression pattern.

## Sheet: Sheet1
D.hydei's orthologous genes with D. mojavensis	NSpoly	NSfix	Spoly	Sfix	MKcodons	FETpval	Direction of selection	D.hydei_male_FPKM	D.hydei_female_FPKM	Expression pattern
FBgn0137877	0	15	3	6	80	0.041502	0.714286	14.193	50.2544	Female-biased
FBgn0281242	0	328	7	171	506	0.00061676	0.657315	99.8526	0.141333	Male_specific
FBgn0137665	0	51	5	27	123	0.00693577	0.653846	13.9114	0	Male_specific
FBgn0133915	0	154	3	85	216	0.0470389	0.644351	21.9063	0	Male_specific
FBgn0142107	0	83	3	46	171	0.0491753	0.643411	108.835	111.436	Unbiased
FBgn0137675	0	197	4	112	366	0.0182523	0.63754	21.5347	0.0160901	Male_specific
FBgn0133214	0	159	5	91	151	0.0070766	0.636	0.16008	0.0723617	NA
FBgn0138800	0	131	13	75	239	4.033e-06	0.635922	70.8681	0.0341309	Male_specific
FBgn0280739	0	112	6	65	194	0.00298254	0.632768	12.7237	0	Male_specific
FBgn0142003	0	188	8	110	283	0.00042077	0.630872	65.144	0.0311162	Male_specific
FBgn0144124	0	67	4	43	123	0.0267299	0.609091	44.4355	0	Male_specific
FBgn0134447	0	142	7	97	336	0.00214049	0.594142	240.295	0.260013	Male-biased
FBgn0140019	0	143	6	98	315	0.00511467	0.593361	25.8713	0.0718855	Male_specific
FBgn0142792	0	96	6	67	244	0.00575468	0.588957	68.8909	0.0230002	Male_specific
FBgn0136245	0	66	5	47	145	0.0148543	0.584071	65.7085	34.8244	Unbiased
FBgn0138564	0	225	5	163	366	0.0137909	0.579897	23.4078	0	Male_specific
FBgn0138390	0	77	4	56	156	0.0347223	0.578947	6.48256	0.396144	Male-biased
FBgn0137038	0	52	5	38	126	0.0166136	0.577778	44.4185	0	Male_specific
FBgn0134128	0	402	8	296	1082	0.00112073	0.575931	34.2796	0.00725763	Male_specific
FBgn0145213	0	74	4	57	206	0.0394364	0.564885	15.9498	0	Male_specific
FBgn0139114	0	91	6	72	281	0.00868293	0.558282	75.7227	81.9373	Unbiased
FBgn0141272	0	121	5	99	313	0.020013	0.55	84.024	0.0224275	Male_specific
FBgn0280466	0	159	7	133	411	0.00454723	0.544521	6.14056	1.8353	Male-biased
FBgn0142080	0	37	6	31	129	0.0250988	0.544118	75.1183	0	Male_specific
FBgn0137882	0	107	6	90	363	0.0102765	0.543147	19.813	0.130348	Male_specific
FBgn0139506	0	120	6	103	300	0.0108001	0.538117	35.8151	52.3044	Unbiased
FBgn0144282	0	86	4	74	310	0.0491007	0.5375	53.3774	0.0105884	Male_specific
FBgn0141457	0	79	4	68	206	0.0494335	0.537415	58.4255	0	Male_specific
FBgn0145715	0	101	13	87	317	7.52962e-05	0.537234	5.58094	0	Male_specific
FBgn0141659	0	157	5	136	514	0.0228312	0.535836	27.3735	0	Male_specific
FBgn0138219	1	110	12	70	282	0.000176056	0.534188	0.058681	0.119707	NA
FBgn0138883	0	192	15	168	567	1.5612e-05	0.533333	77.6553	0	Male_specific
FBgn0137556	0	208	6	184	454	0.0113513	0.530612	43.0825	33.4978	Unbiased
FBgn0144541	0	98	10	87	403	0.000725882	0.52973	7.09806	4.94816	Unbiased
FBgn0143015	0	48	6	43	138	0.0265696	0.527473	0.162071	0	NA
FBgn0134913	1	187	14	134	473	6.62453e-05	0.515888	51.7609	0.0392003	Male_specific
FBgn0138887	0	123	10	116	373	0.00162989	0.514644	47.2118	0.0313384	Male_specific
FBgn0140914	1	417	11	282	690	0.000393767	0.513233	16.4021	0	Male_specific
FBgn0140713	1	370	16	277	1046	1.66005e-05	0.513047	23.286	0.0326358	Male_specific
FBgn0140257	0	107	9	103	351	0.00335881	0.509524	0.558557	0	NA
FBgn0144571	1	141	13	102	326	0.00016628	0.508818	191.429	0.0635047	Male_specific
FBgn0133679	0	177	9	175	556	0.00357699	0.502841	56.6445	0.0154459	Male_specific
FBgn0138774	1	134	9	89	344	0.00211942	0.500897	44.3375	0.0201338	Male_specific
FBgn0137777	4	503	22	271	953	4.45575e-07	0.496025	7.24315	0.0126049	Male_specific
FBgn0134624	0	90	8	92	323	0.00726613	0.494505	594.324	0.159697	Male_specific
FBgn0135769	0	44	6	45	178	0.028844	0.494382	5.40198	24.7399	Female-biased
FBgn0281262	1	116	9	80	248	0.00261557	0.491837	9.43727	0	Male_specific
FBgn0138557	1	597	26	537	1713	8.53214e-08	0.489418	7.91049	13.1673	Unbiased
FBgn0138084	0	121	9	127	504	0.00382681	0.487903	117.422	0.0097384	Male_specific
FBgn0133916	0	60	6	63	299	0.0298762	0.487805	41.9799	0	Male_specific
FBgn0134811	2	159	11	91	319	0.000736888	0.482154	33.9835	0	Male_specific
FBgn0139411	0	76	7	82	335	0.0156305	0.481013	100.78	0.014875	Male_specific
FBgn0137664	2	469	11	273	688	0.000648918	0.478229	71.8559	0.0302799	Male_specific
FBgn0134432	1	122	14	102	318	0.000257187	0.477976	396.751	0.0811848	Male_specific
FBgn0144429	1	93	6	57	191	0.0170377	0.477143	14.4437	0	Male_specific
FBgn0143805	1	277	28	265	846	7.4723e-08	0.476587	121.76	0.0586401	Male_specific
FBgn0147333	0	105	8	116	442	0.00832373	0.475113	3.72577	21.7953	Female-biased
FBgn0141243	0	110	6	122	433	0.0319368	0.474138	375.711	1.25132	Male-biased
FBgn0280748	3	279	14	152	356	0.000133288	0.470861	96.2351	0.0139671	Male_specific
FBgn0142304	1	27	6	17	117	0.0367584	0.470779	2100.12	1074.92	Unbiased
FBgn0143701	4	277	20	158	502	1.103e-05	0.470115	25.8099	0	Male_specific
FBgn0145864	0	31	6	35	150	0.0334915	0.469697	0.574974	0	NA
FBgn0280774	1	163	6	104	320	0.0179897	0.46763	3.27134	1.0266	Male-biased
FBgn0147068	1	115	12	97	386	0.00103433	0.46553	65.5631	0.0146999	Male_specific
FBgn0133656	0	46	6	53	251	0.0338177	0.464646	10.8454	0	Male_specific
FBgn0135971	3	118	13	63	188	0.000646934	0.464434	38.7453	0.0454367	Male_specific
FBgn0141715	1	325	16	297	847	9.29386e-05	0.463685	14.6649	0.00964982	Male_specific
FBgn0135516	0	69	11	80	284	0.0025828	0.463087	7.11552	0.0931662	Male_specific
FBgn0139106	2	122	8	62	152	0.00489454	0.463043	12.7673	0	Male_specific
FBgn0134962	0	100	10	116	538	0.00268252	0.462963	45.55	0	Male_specific
FBgn0143901	1	273	9	212	573	0.00641162	0.462887	33.9867	0	Male_specific
FBgn0139936	1	94	8	70	216	0.0115799	0.46206	15.9563	0.021442	Male_specific
FBgn0146053	1	152	9	119	394	0.00636374	0.460886	195.138	0.0413065	Male_specific
FBgn0084878	2	247	9	138	374	0.00290142	0.45974	151.54	0.0566956	Male_specific
FBgn0139201	1	241	16	224	869	0.000108657	0.459456	63.118	0.0161283	Male_specific
FBgn0144522	2	321	24	280	1079	2.28381e-06	0.457187	9.00904	10.5795	Unbiased
FBgn0142412	0	45	7	54	167	0.019764	0.454545	1585.69	0.0520556	Male_specific
FBgn0140052	2	298	16	230	610	0.000133576	0.453283	82.0772	0.149047	Male_specific
FBgn0145912	1	183	14	169	483	0.000399899	0.45322	49.9442	0	Male_specific
FBgn0143983	1	217	23	222	800	6.48102e-06	0.452639	5.99821	0.0069434	Male_specific
FBgn0144649	1	214	11	186	590	0.00212482	0.451667	124.775	0	Male_specific
FBgn0137848	1	214	11	187	571	0.00216507	0.450333	71.126	0.0470423	Male_specific
FBgn0140599	2	153	12	105	326	0.00131737	0.450166	187.338	0	Male_specific
FBgn0142826	0	115	15	141	594	0.000223002	0.449219	41.5834	23.9523	Unbiased
FBgn0133766	0	65	6	80	323	0.037126	0.448276	44.1375	36.5715	Unbiased
FBgn0133717	0	43	9	53	226	0.00993031	0.447917	0	0	NA
FBgn0141929	0	72	8	89	221	0.0214632	0.447205	152.533	2.47517	Male-biased
FBgn0133967	1	218	10	189	612	0.00409557	0.444717	73.8788	0.00768033	Male_specific
FBgn0146079	1	143	16	142	494	0.000239189	0.442931	124.604	65.0397	Unbiased
FBgn0280611	2	107	5	40	211	0.0228904	0.442177	700.495	0.179299	Male_specific
FBgn0147269	1	367	12	341	954	0.00138805	0.441439	130.414	0.0213647	Male_specific
FBgn0142755	1	101	8	82	292	0.0134979	0.440801	36.9981	99.8368	Female-biased
FBgn0133655	1	105	13	100	314	0.00142629	0.440767	175.15	0	Male_specific
FBgn0137801	1	253	7	195	476	0.0244732	0.439732	207.005	0.0338914	Male_specific
FBgn0137576	0	126	10	161	780	0.00595078	0.439024	5.60847	25.4562	Female-biased
FBgn0136063	6	330	18	149	545	2.15087e-05	0.438935	5.44508	0	Male_specific
FBgn0145720	1	128	8	105	250	0.0137032	0.438245	13.1869	0	Male_specific
FBgn0139864	2	188	12	137	423	0.00161809	0.435604	25.5054	1.87472	Male-biased
FBgn0144647	1	194	11	181	585	0.00281603	0.434	25.8681	0	Male_specific
FBgn0138167	1	132	11	124	415	0.00532693	0.432292	12.1339	57.0284	Female-biased
FBgn0136111	0	73	10	96	341	0.00593596	0.431953	6.8396	23.4162	Female-biased
FBgn0145219	0	55	8	73	233	0.0211694	0.429688	85.8652	22.1539	Male-biased
FBgn0140158	1	74	8	63	238	0.0154506	0.429035	20.819	0.101699	Male_specific
FBgn0143723	1	57	10	53	234	0.00904132	0.427273	68.2454	0.024972	Male_specific
FBgn0140046	0	43	7	58	236	0.0403355	0.425743	39.1278	0	Male_specific
FBgn0144532	1	72	9	65	261	0.0174742	0.425547	1.38767	122.324	Female-biased
FBgn0135185	2	133	12	101	341	0.00205376	0.425519	190.015	1.33928	Male-biased
FBgn0143588	2	177	13	141	522	0.002244	0.42327	6.50216	0	Male_specific
FBgn0135105	0	60	7	82	234	0.0418431	0.422535	294.857	0.996977	Male-biased
FBgn0134220	0	49	14	68	274	0.00103248	0.418803	173.411	0.0216113	Male_specific
FBgn0143363	2	86	8	53	174	0.0159426	0.418705	33.9948	15.59	Male-biased
FBgn0141331	1	51	7	43	190	0.0295648	0.417553	16.1058	8.28589	Unbiased
FBgn0134198	1	90	9	84	248	0.0183031	0.417241	6.43904	0	Male_specific
FBgn0280507	2	114	17	105	426	0.000484394	0.415285	0	0	NA
FBgn0135920	8	516	38	360	1112	4.12691e-08	0.415128	29.9253	0	Male_specific
FBgn0142693	2	79	7	45	137	0.0278915	0.414875	0.405565	0	NA
FBgn0135139	1	255	37	323	1163	2.15375e-08	0.414861	7.60866	51.9464	Female-biased
FBgn0146824	0	124	7	177	571	0.044328	0.41196	135.655	0.00525402	Male_specific
FBgn0143123	5	231	19	142	523	0.000129141	0.41097	132.82	0.0459276	Male_specific
FBgn0281398	3	89	9	46	197	0.00966379	0.409259	1.95945	5.8689	Female-biased
FBgn0134352	1	122	12	129	499	0.00353976	0.409133	73.1509	0.800061	Male-biased
FBgn0133834	0	87	10	126	427	0.00730419	0.408451	90.528	5.17847	Male-biased
FBgn0134319	3	198	24	184	639	3.02778e-05	0.407213	63.561	0.163717	Male_specific
FBgn0135232	0	57	13	83	309	0.00206737	0.407143	87.2489	0.759734	Male-biased
FBgn0144018	0	80	13	117	416	0.00210587	0.406091	12.4597	69.4955	Female-biased
FBgn0085013	2	111	13	95	380	0.00258839	0.405502	91.9852	32.6815	Male-biased
FBgn0141683	0	107	9	157	558	0.0132522	0.405303	118.602	15.0726	Male-biased
FBgn0134795	2	109	7	65	565	0.0297648	0.404215	2.56089	1.28535	Unbiased
FBgn0146698	0	56	12	83	298	0.00384545	0.402878	178.016	0.223931	Male-biased
FBgn0147536	2	88	8	58	205	0.0184146	0.40274	2.42299	30.4322	Female-biased
FBgn0144637	2	399	8	263	407	0.0179201	0.402719	0.00937655	0	NA
FBgn0144427	1	95	10	98	374	0.0110727	0.401319	19.8615	0	Male_specific
FBgn0146757	2	61	7	37	210	0.0307862	0.400227	35.2486	26.0461	Unbiased
FBgn0143137	3	164	18	138	643	0.000425182	0.400189	3.28925	1.58719	Male-biased
FBgn0146029	0	106	19	159	530	0.000115948	0.4	73.8391	49.5077	Unbiased
FBgn0133293	3	148	8	72	247	0.0179278	0.4	48.8539	0	Male_specific
FBgn0143753	0	129	18	194	616	0.000212139	0.399381	118.251	0.0202099	Male_specific
FBgn0134224	2	128	16	123	389	0.00101715	0.398849	0.344761	0.224229	NA
FBgn0138413	0	39	11	59	272	0.00709341	0.397959	13.3705	8.61283	Unbiased
FBgn0136238	2	93	9	68	249	0.0129072	0.395822	3.43864	23.2872	Female-biased
FBgn0137365	1	95	8	93	322	0.0353631	0.394208	22.1453	16.7235	Unbiased
FBgn0137357	4	361	18	266	674	0.000287304	0.393939	0.802624	14.656	Female-biased
FBgn0138901	0	159	11	245	798	0.00830718	0.393564	8.39873	18.8157	Female-biased
FBgn0136908	2	188	12	163	552	0.0048681	0.392755	37.8178	0.124348	Male_specific
FBgn0145894	0	29	8	45	198	0.0456747	0.391892	64.3084	46.6944	Unbiased
FBgn0139507	0	42	10	66	315	0.0136091	0.388889	258.415	80.8247	Male-biased
FBgn0139396	0	124	20	196	743	0.000136484	0.3875	32.8285	0.0265972	Male_specific
FBgn0144134	2	116	11	99	312	0.00861432	0.385689	37.0513	0	Male_specific
FBgn0146008	1	45	11	51	402	0.0122336	0.385417	6.77535	22.5418	Female-biased
FBgn0135264	4	165	15	112	392	0.00136378	0.385142	223.967	0.0605362	Male_specific
FBgn0137645	1	81	9	86	409	0.0212518	0.38503	0.046402	0	NA
FBgn0141379	1	67	10	74	241	0.0233468	0.384268	0.738592	0.159168	NA
FBgn0134898	1	154	8	157	546	0.037256	0.384066	46.7763	34.4277	Unbiased
FBgn0137972	0	43	8	69	213	0.0493972	0.383929	14.6246	0	Male_specific
FBgn0135095	0	43	8	69	329	0.0493972	0.383929	22.336	58.3809	Female-biased
FBgn0138148	1	141	10	156	517	0.0128716	0.383838	31.8746	41.8713	Unbiased
FBgn0136875	0	36	9	58	216	0.0252364	0.382979	52.1238	0.0753719	Male_specific
FBgn0138223	1	85	9	91	349	0.0215813	0.382955	36.5773	0	Male_specific
FBgn0144598	2	32	8	23	92	0.0386143	0.381818	21.3412	25.155	Unbiased
FBgn0146068	1	119	9	128	401	0.0217361	0.381781	0.129651	0.455972	NA
FBgn0135350	1	49	9	53	258	0.022749	0.380392	511.317	185.21	Male-biased
FBgn0138327	3	277	15	231	734	0.00154869	0.378609	119.703	0.0170581	Male_specific
FBgn0139778	0	111	11	183	672	0.00856831	0.377551	339.133	0.0591728	Male_specific
FBgn0143827	3	295	11	204	440	0.00587365	0.376897	61.4091	0	Male_specific
FBgn0139743	2	282	10	237	655	0.0155944	0.376686	108.761	0.124601	Male_specific
FBgn0139375	2	99	18	109	418	0.000853496	0.375962	5.38654	0.0470338	Male_specific
FBgn0133949	6	600	23	431	1017	7.3808e-05	0.375063	50.947	0.00503979	Male_specific
FBgn0139566	0	21	9	35	189	0.0259075	0.375	0	0.281704	NA
FBgn0137876	0	73	12	122	554	0.00923536	0.374359	6.63999	11.8554	Unbiased
FBgn0137715	2	168	24	205	654	0.000117645	0.373479	24.1815	0.00997838	Male_specific
FBgn0142885	3	277	30	320	861	1.49299e-05	0.373078	42.1057	0.00892673	Male_specific
FBgn0144294	1	99	18	134	469	0.000995344	0.372261	8.24026	17.2368	Female-biased
FBgn0135476	2	324	11	292	961	0.00974979	0.372128	518.818	0.164774	Male_specific
FBgn0140212	1	90	23	128	591	0.000206157	0.371177	36.9866	0	Male_specific
FBgn0147147	1	96	20	134	690	0.000630625	0.369772	20.0442	7.2927	Male-biased
FBgn0141912	1	38	9	43	260	0.0392942	0.369136	2.27054	1.01325	Male-biased
FBgn0135918	2	72	10	63	179	0.0170638	0.366667	349.101	0.0899731	Male_specific
FBgn0144533	2	152	15	162	638	0.00451315	0.366429	35.6522	33.0946	Unbiased
FBgn0141242	2	138	12	133	433	0.011081	0.366368	283.331	5.12588	Male-biased
FBgn0139777	0	63	13	109	438	0.00491525	0.366279	146.533	0	Male_specific
FBgn0143052	5	437	25	383	1156	6.1717e-05	0.36626	33.0349	0	Male_specific
FBgn0140805	3	189	10	128	407	0.0179963	0.365445	17.2788	0	Male_specific
FBgn0138452	1	140	8	154	568	0.0402951	0.365079	7.6781	27.435	Female-biased
FBgn0280633	2	75	8	58	174	0.0442628	0.36391	0.0608152	0	NA
FBgn0142780	2	124	20	149	571	0.000592098	0.363303	0.0218247	0	NA
FBgn0084608	0	71	9	125	380	0.028836	0.362245	563.434	0.88446	Male-biased
FBgn0139526	0	46	10	81	381	0.0165739	0.362205	10.223	0.014101	Male_specific
FBgn0144300	6	660	22	485	1119	0.000153903	0.362133	8.11879	32.9144	Female-biased
FBgn0140453	7	175	22	115	456	0.000261983	0.362069	52.1637	0.00578115	Male_specific
FBgn0135430	1	124	22	182	605	0.000227348	0.36175	6.69933	26.1349	Female-biased
FBgn0145989	1	33	10	40	180	0.0246421	0.361146	91.4465	142.159	Unbiased
FBgn0147036	0	9	10	16	146	0.0363008	0.36	7.1309	0.246882	Male-biased
FBgn0134676	2	155	22	195	757	0.000387873	0.359524	3.13399	2.54116	Unbiased
FBgn0141250	15	508	50	353	1083	1.78881e-08	0.359242	10.3916	0.00427864	Male_specific
FBgn0135051	1	55	9	65	186	0.0425702	0.358333	1772.68	0.270048	Male-biased
FBgn0133774	2	195	11	186	692	0.0203702	0.357965	12.3673	11.7747	Unbiased
FBgn0134807	2	58	8	46	156	0.0449365	0.357692	655.3	363.631	Unbiased
FBgn0145082	3	141	18	141	410	0.00133642	0.357143	171.774	263.31	Unbiased
FBgn0135442	3	135	18	135	406	0.00134338	0.357143	91.5148	0	Male_specific
FBgn0135629	0	148	35	267	1011	6.42439e-07	0.356627	23.6113	0.0383875	Male_specific
FBgn0133787	3	291	12	232	627	0.00758413	0.356405	305.088	573.648	Unbiased
FBgn0143026	0	62	10	112	386	0.0173023	0.356322	157.064	0.133916	Male_specific
FBgn0134347	1	90	16	127	487	0.00334091	0.355923	25.5411	0.0487252	Male_specific
FBgn0140965	1	106	8	121	402	0.0427427	0.355849	2.16635	1.56002	Unbiased
FBgn0138622	3	357	8	211	650	0.0245063	0.355794	3.09116	67.2093	Female-biased
FBgn0142535	0	69	9	126	496	0.029931	0.353846	64.0596	75.1151	Unbiased
FBgn0140443	3	225	14	200	564	0.00528671	0.352941	99.6552	0.0259305	Male_specific
FBgn0133173	1	78	17	113	518	0.0020142	0.352821	18.0676	35.6631	Unbiased
FBgn0136473	0	63	17	116	580	0.00174715	0.351955	7.9266	20.0719	Female-biased
FBgn0133405	2	183	7	136	528	0.0446683	0.351445	53.5894	0.00766249	Male_specific
FBgn0134776	7	313	28	255	725	7.17288e-05	0.351056	155.572	0.0349292	Male_specific
FBgn0146851	0	61	9	113	480	0.0304065	0.350575	0.153658	99.809	NA
FBgn0137732	1	123	9	150	589	0.0465679	0.350549	8.13966	4.30351	Unbiased
FBgn0135162	5	113	16	79	342	0.00251829	0.350446	0.0121335	0.00754714	NA
FBgn0143366	0	69	18	128	603	0.000975768	0.350254	0.939915	0.446953	NA
FBgn0145449	1	100	10	127	374	0.0268562	0.34962	0.719755	0	NA
FBgn0135063	0	36	11	67	294	0.0161375	0.349515	2.76467	5.06319	Unbiased
FBgn0141386	0	44	9	82	355	0.030636	0.349206	9.63749	27.0938	Female-biased
FBgn0133578	0	81	9	151	584	0.0308179	0.349138	5.13612	3.41398	Unbiased
FBgn0137780	0	59	14	110	475	0.00544861	0.349112	11.2102	59.3207	Female-biased
FBgn0139616	1	87	9	107	387	0.0455383	0.348454	234.509	163.866	Unbiased
FBgn0136284	5	422	14	268	761	0.00334379	0.348436	10.6303	0.0191796	Male_specific
FBgn0143579	3	198	11	154	429	0.0127836	0.348214	4.00833	0.0555113	Male_specific
FBgn0134869	3	149	7	81	299	0.0402283	0.347826	250.075	0.16786	Male_specific
FBgn0133547	2	110	10	104	375	0.0337504	0.347352	23.3994	11.7674	Unbiased
FBgn0136307	1	67	10	86	345	0.0270281	0.346999	43.7956	0	Male_specific
FBgn0142578	2	90	16	107	492	0.00502813	0.345742	237.077	0.0623925	Male_specific
FBgn0143106	2	163	22	217	517	0.000463467	0.345614	12.5844	7.20999	Unbiased
FBgn0133236	3	118	8	73	272	0.0292091	0.345074	0	0	NA
FBgn0142359	6	128	11	56	198	0.0065026	0.342711	14.2693	0	Male_specific
FBgn0135929	3	154	9	106	319	0.0323547	0.342308	112.662	0.0746349	Male_specific
FBgn0135970	1	83	13	118	425	0.0103341	0.341507	18.8089	33.3472	Unbiased
FBgn0139881	1	292	65	529	1890	4.13634e-11	0.340512	27.1221	0.0246848	Male_specific
FBgn0138714	1	125	18	193	641	0.0023991	0.34045	72.6645	9.52223	Male-biased
FBgn0144636	0	33	14	64	234	0.0094459	0.340206	6.46097	0.142026	Male_specific
FBgn0139265	0	60	13	117	421	0.0103549	0.338983	15.9672	25.459	Unbiased
FBgn0144508	5	209	11	112	295	0.0136871	0.33859	72.4462	0.0292869	Male_specific
FBgn0139290	6	243	23	203	891	0.000423687	0.337946	15.0395	24.4995	Unbiased
FBgn0140112	0	25	10	49	182	0.0291304	0.337838	38.1068	0	Male_specific
FBgn0134173	0	264	44	518	1716	3.87566e-08	0.337596	99.9049	0.0248067	Male_specific
FBgn0144222	2	157	25	225	840	0.000321392	0.336921	40.008	47.4237	Unbiased
FBgn0134989	3	117	18	127	510	0.00266825	0.336651	31.1124	0.0638904	Male_specific
FBgn0137750	0	39	11	77	391	0.017815	0.336207	8.82615	50.013	Female-biased
FBgn0140746	9	487	57	546	1949	3.03728e-08	0.335079	19.6307	0.707634	Male-biased
FBgn0135800	0	70	13	139	419	0.0107375	0.334928	282.472	0.114924	Male_specific
FBgn0137662	1	99	14	148	498	0.0113007	0.334143	140.28	0.414168	Male-biased
FBgn0281405	3	94	25	120	483	0.000745199	0.332109	0.139775	0	NA
FBgn0139316	4	162	7	71	203	0.0406777	0.331643	4.23707	0.0255454	Male_specific
FBgn0136556	2	79	11	84	285	0.0228297	0.330816	10.9454	16.1462	Unbiased
FBgn0136314	2	163	13	189	549	0.0149307	0.329735	19.4394	114.744	Female-biased
FBgn0137218	5	206	25	209	707	0.000470257	0.329719	86.9309	0.0107366	Male_specific
FBgn0134526	2	323	30	502	1578	5.34024e-05	0.329015	44.3367	0.468089	Male-biased
FBgn0138916	5	165	20	148	647	0.00163211	0.327157	0.5495	0.092305	NA
FBgn0134485	4	99	26	116	503	0.000598947	0.327132	3.92102	4.37323	Unbiased
FBgn0147581	6	216	19	165	505	0.00165162	0.326929	0.201145	0	NA
FBgn0133098	2	115	10	118	374	0.0362419	0.326896	113.402	0.0153665	Male_specific
FBgn0138225	0	76	15	157	510	0.00671021	0.32618	9.69224	16.0367	Unbiased
FBgn0140291	3	89	10	71	205	0.039696	0.325481	186.866	0	Male_specific
FBgn0145095	1	92	20	155	697	0.00152899	0.324851	9.61814	7.12055	Unbiased
FBgn0136401	4	121	18	118	409	0.00352552	0.324458	21.7303	0.0634241	Male_specific
FBgn0280570	6	239	11	114	301	0.00836819	0.324113	260.346	0.0354992	Male_specific
FBgn0135133	0	33	12	69	408	0.0176407	0.323529	56.1733	0.0618228	Male_specific
FBgn0142461	4	181	15	158	605	0.00810919	0.323397	38.6704	45.0763	Unbiased
FBgn0139324	3	122	15	127	448	0.0124054	0.323293	24.1369	12.5061	Unbiased
FBgn0138132	1	116	14	182	606	0.0119482	0.322595	0.128959	0.258822	NA
FBgn0139101	0	90	12	189	576	0.0207228	0.322581	5.96861	24.0886	Female-biased
FBgn0137872	0	78	13	164	588	0.0112835	0.322314	9.72717	12.1888	Unbiased
FBgn0132913	3	141	15	148	440	0.0128047	0.321223	31.203	22.1166	Unbiased
FBgn0280439	5	166	12	104	265	0.0111107	0.320697	7.51648	0.143345	Male_specific
FBgn0144202	0	49	10	104	354	0.0333671	0.320261	39.5564	24.1183	Unbiased
FBgn0141756	4	89	10	58	223	0.0252604	0.319728	502.574	401.568	Unbiased
FBgn0146975	2	134	23	203	900	0.00100651	0.317626	0.730148	0.0823133	NA
FBgn0281002	1	129	11	193	513	0.0326794	0.317288	85.4127	9.45729	Male-biased
FBgn0138108	2	122	16	163	652	0.0113041	0.316959	20.3149	30.2297	Unbiased
FBgn0139873	2	70	10	75	351	0.0389533	0.316092	2.03428	1.33052	Unbiased
FBgn0144188	1	31	12	48	303	0.0295925	0.315482	1.28591	0.540616	Male-biased
FBgn0145456	6	352	16	247	878	0.00400088	0.314919	12.9144	76.6378	Female-biased
FBgn0137624	0	96	11	209	687	0.0384342	0.314754	29.9876	30.627	Unbiased
FBgn0143370	4	213	16	201	608	0.0100123	0.314493	54.7645	0.00493802	Male_specific
FBgn0141867	1	70	11	106	510	0.032382	0.314394	38.8987	30.9533	Unbiased
FBgn0146936	1	40	14	65	403	0.0184125	0.314286	23.3642	22.9192	Unbiased
FBgn0133297	0	27	13	59	360	0.0173499	0.313953	7.52285	1.74323	Male-biased
FBgn0143840	6	719	19	579	1664	0.00200769	0.313929	93.825	279.871	Female-biased
FBgn0147112	0	32	15	70	512	0.0103409	0.313725	0.262515	0.083413	NA
FBgn0140850	4	185	8	101	345	0.0344139	0.31352	47.1479	0.174623	Male_specific
FBgn0138537	4	136	9	83	358	0.0381579	0.313312	253.101	78.8152	Male-biased
FBgn0146618	3	366	11	328	530	0.0281307	0.313092	92.4591	40.5217	Male-biased
FBgn0280564	6	178	27	182	628	0.000464381	0.312626	101.27	1.80065	Male-biased
FBgn0144071	4	138	15	126	389	0.00911512	0.312201	115.965	0.019334	Male_specific
FBgn0141231	0	54	14	120	670	0.0115136	0.310345	19.6089	3.86285	Male-biased
FBgn0134789	1	147	12	233	687	0.0370029	0.309919	44.253	0.0070653	Male_specific
FBgn0142283	3	159	9	125	289	0.0411271	0.309859	53.8035	0	Male_specific
FBgn0145318	3	108	12	104	344	0.0300357	0.309434	115.584	0.0100684	Male_specific
FBgn0147482	4	141	13	118	350	0.0215684	0.309107	0.0955846	0.082468	NA
FBgn0133801	0	44	12	99	442	0.019963	0.307692	39.0905	0.214808	Male-biased
FBgn0146125	0	62	12	140	452	0.0205139	0.306931	356.529	985.575	Female-biased
FBgn0146112	6	211	24	207	696	0.0011581	0.304785	481.55	0.0839405	Male_specific
FBgn0142152	0	46	21	105	603	0.00119808	0.304636	43.3347	34.8113	Unbiased
FBgn0141275	2	61	14	81	377	0.0283686	0.304577	66.7416	58.5213	Unbiased
FBgn0133149	1	74	16	131	546	0.0137318	0.302152	17.564	17.6827	Unbiased
FBgn0138380	0	35	11	81	289	0.0340824	0.301724	2.3581	32.0739	Female-biased
FBgn0140854	2	56	13	73	292	0.0270846	0.300775	139.293	0.0237121	Male_specific
FBgn0146118	4	181	15	173	658	0.0163954	0.300773	366.323	0.191207	Male_specific
FBgn0141758	3	87	11	82	399	0.0485887	0.300507	0.485965	0.289319	NA
FBgn0146568	2	43	12	54	221	0.0413916	0.300442	0.0897474	0	NA
FBgn0143824	0	82	14	191	497	0.012641	0.300366	184.659	7.24079	Male-biased
FBgn0139180	1	141	14	244	1028	0.0240523	0.299567	12.8696	40.8753	Female-biased
FBgn0139050	3	231	10	205	544	0.0464877	0.299047	43.4203	31.1623	Unbiased
FBgn0143053	6	438	19	375	1203	0.00379829	0.298745	40.2153	0.00517251	Male_specific
FBgn0134315	2	74	14	101	463	0.0298722	0.297857	69.5367	17.8161	Male-biased
FBgn0136816	1	133	18	247	756	0.00537972	0.297368	36.0829	30.7986	Unbiased
FBgn0138687	0	71	13	168	617	0.0222568	0.297071	224.973	0.0699912	Male_specific
FBgn0147539	0	46	18	109	481	0.00388653	0.296774	2.4669	2.15578	Unbiased
FBgn0144186	1	75	14	132	605	0.0221319	0.295652	7.7002	12.8017	Unbiased
FBgn0138109	0	31	11	74	309	0.035003	0.295238	75.3994	0	Male_specific
FBgn0144530	1	80	12	136	534	0.0360396	0.293447	4.58535	38.799	Female-biased
FBgn0281037	5	64	11	42	226	0.0335753	0.291274	0	0	NA
FBgn0134854	4	136	10	100	256	0.0498473	0.290557	21.4149	0.0514014	Male_specific
FBgn0133976	0	18	12	44	230	0.0317823	0.290323	8.19152	4.38484	Unbiased
FBgn0135880	5	202	18	196	756	0.00887591	0.290146	12.8399	32.9753	Female-biased
FBgn0135856	0	38	12	93	506	0.0361881	0.290076	3.35327	1.064	Male-biased
FBgn0140926	4	161	18	181	644	0.00805699	0.288942	14.0336	0	Male_specific
FBgn0137921	2	58	19	93	535	0.0126764	0.288868	1.22953	0.465881	Male-biased
FBgn0143798	1	98	22	197	728	0.00211017	0.288725	100.9	0.166782	Male_specific
FBgn0133255	1	114	22	230	1121	0.00215519	0.287917	5.02919	43.4219	Female-biased
FBgn0141121	7	152	28	161	578	0.0011697	0.285623	0	0.02571	NA
FBgn0133060	6	295	18	256	817	0.00655932	0.28539	30.7547	27.7645	Unbiased
FBgn0139985	6	180	31	223	773	0.000756211	0.284488	38.061	58.7874	Unbiased
FBgn0139876	1	85	17	165	684	0.015775	0.284444	56.4062	111.383	Unbiased
FBgn0133416	2	100	16	153	592	0.0210673	0.284146	5.2538	4.35478	Unbiased
FBgn0142111	2	113	11	145	428	0.0478179	0.284138	19.4906	45.7843	Female-biased
FBgn0137607	5	209	30	281	886	0.000642322	0.283673	1.65408	33.4504	Female-biased
FBgn0138075	0	41	22	104	532	0.00235303	0.282759	7.60425	22.2583	Female-biased
FBgn0146668	0	72	14	184	651	0.024589	0.28125	1.55495	6.96981	Female-biased
FBgn0142082	2	85	14	125	539	0.0318552	0.279762	140.623	0.014384	Male_specific
FBgn0135400	3	72	14	86	349	0.0372865	0.279226	70.1055	31.9901	Male-biased
FBgn0144809	3	131	16	169	782	0.016985	0.278772	197.868	0.139388	Male_specific
FBgn0140921	3	191	22	288	761	0.00519457	0.278747	67.7082	0.00754215	Male_specific
FBgn0144486	3	60	19	85	439	0.0166387	0.277429	4.06607	4.99393	Unbiased
FBgn0145801	1	54	13	101	788	0.0377153	0.276959	0.116291	0.0674231	NA
FBgn0146130	0	58	16	152	622	0.0140007	0.27619	7.68102	14.8186	Unbiased
FBgn0144501	10	459	23	334	948	0.00206941	0.275784	15.4406	12.0509	Unbiased
FBgn0135175	1	60	18	123	447	0.0155269	0.275237	30.7698	82.4744	Female-biased
FBgn0134996	3	170	18	237	1062	0.0118677	0.274833	101.454	139.742	Unbiased
FBgn0140220	4	212	16	236	735	0.0204621	0.273214	160.786	4.59453	Male-biased
FBgn0145097	3	84	16	111	491	0.026207	0.272874	6.8268	5.02207	Unbiased
FBgn0136592	7	281	21	257	1013	0.0059743	0.272305	8.7776	54.5891	Female-biased
FBgn0145866	4	66	22	89	665	0.00868282	0.27196	0.0966933	0.0101163	NA
FBgn0134271	4	141	13	137	442	0.0432496	0.2719	24.2222	12.3431	Unbiased
FBgn0137472	2	170	16	274	862	0.023064	0.271772	7.14577	16.6358	Female-biased
FBgn0139657	7	110	14	72	248	0.0205451	0.271062	18.5063	0	Male_specific
FBgn0140305	7	153	27	168	445	0.00322514	0.270753	3.62389	0	Male_specific
FBgn0141199	0	49	14	132	534	0.0229256	0.270718	70.2607	55.8308	Unbiased
FBgn0146986	0	24	13	65	577	0.0349557	0.269663	1.23362	0.539429	Male-biased
FBgn0133817	12	636	40	635	2448	0.000110792	0.269624	3.93597	11.3595	Female-biased
FBgn0137404	4	233	16	264	849	0.0211195	0.268813	87.4706	0.604183	Male-biased
FBgn0138797	5	262	22	317	1122	0.00870547	0.267319	0.765464	0.149183	NA
FBgn0133749	3	78	17	109	417	0.0279548	0.267112	7.99511	6.23911	Unbiased
FBgn0141346	2	52	17	88	412	0.0211733	0.266165	0.269747	0.427584	NA
FBgn0143049	8	95	19	74	247	0.0125139	0.265834	35.5985	59.2948	Unbiased
FBgn0142189	2	68	33	143	644	0.000896975	0.265132	50.1902	57.2261	Unbiased
FBgn0142684	3	77	18	112	408	0.018147	0.26455	0.254716	0.049452	NA
FBgn0141463	0	46	20	128	582	0.00460565	0.264368	36.1885	14.3482	Male-biased
FBgn0134152	1	125	29	295	1053	0.00063286	0.264286	25.8328	0	Male_specific
FBgn0134987	2	73	21	135	519	0.00921921	0.264005	41.1264	0.0248448	Male_specific
FBgn0143537	3	91	23	149	671	0.00840168	0.263782	56.954	22.2684	Male-biased
FBgn0145835	3	98	18	143	517	0.0187171	0.263782	16.8167	1.82073	Male-biased
FBgn0144995	2	95	19	170	700	0.0151483	0.263252	9.0827	20.7774	Female-biased
FBgn0134971	0	50	17	140	474	0.0144422	0.263158	6.17323	21.3216	Female-biased
FBgn0140868	0	27	13	76	402	0.0368319	0.262136	16.5731	9.02656	Unbiased
FBgn0147039	1	72	26	169	713	0.00236613	0.261718	10.7685	13.0819	Unbiased
FBgn0140913	6	301	15	249	673	0.0243138	0.261558	16.2143	0	Male_specific
FBgn0146368	0	42	15	119	375	0.0233642	0.26087	62.1092	0	Male_specific
FBgn0138386	4	111	20	149	597	0.0156053	0.260256	8.64756	14.8245	Unbiased
FBgn0134805	4	56	15	63	206	0.0453343	0.260062	8.75856	0.0784799	Male_specific
FBgn0139546	0	26	13	74	341	0.0370046	0.26	7.04057	21.6338	Female-biased
FBgn0138415	5	515	17	542	1789	0.017329	0.259955	7.08484	0.0163128	Male_specific
FBgn0143680	5	113	17	119	484	0.0243968	0.259796	41.7094	0	Male_specific
FBgn0012573	0	96	25	274	1106	0.00116928	0.259459	2.55867	1.63327	Unbiased
FBgn0144155	3	133	17	192	579	0.0313193	0.259231	0.596118	41.8311	NA
FBgn0135159	11	319	53	421	1624	3.07209e-05	0.259206	1.17509	0.0659726	Male_specific
FBgn0140790	1	57	18	126	383	0.015896	0.258844	1.66102	0.254689	Male-biased
FBgn0140102	11	392	21	259	740	0.00514777	0.258401	20.5822	0.00676885	Male_specific
FBgn0145418	2	180	14	290	1039	0.0374346	0.257979	17.2718	26.2932	Unbiased
FBgn0146847	1	59	19	133	566	0.016533	0.257292	90.9816	4.86117	Male-biased
FBgn0146064	5	90	17	96	400	0.0244823	0.256598	9.10033	6.31736	Unbiased
FBgn0132931	7	155	15	115	320	0.0252929	0.255892	14.8613	0.0222187	Male_specific
FBgn0133819	5	185	17	198	782	0.0263356	0.255756	8.85722	28.8596	Female-biased
FBgn0141880	0	34	15	99	450	0.0227667	0.255639	2.71968	46.5326	Female-biased
FBgn0144333	0	60	18	175	636	0.00879313	0.255319	347.072	0.0425262	Male_specific
FBgn0134559	4	73	21	103	418	0.015258	0.254773	22.096	12.5124	Unbiased
FBgn0133201	2	33	23	66	432	0.0122439	0.253333	6.8606	4.12479	Unbiased
FBgn0141877	1	50	17	112	506	0.0257931	0.253086	34.0856	4.84629	Male-biased
FBgn0139849	3	132	15	183	830	0.0461794	0.252381	33.6956	73.2593	Female-biased
FBgn0144779	8	97	19	80	285	0.0217664	0.251726	14.0055	0	Male_specific
FBgn0134791	0	40	16	119	464	0.0244601	0.251572	8.81595	5.97254	Unbiased
FBgn0138284	8	242	35	311	1198	0.00115387	0.251567	7.26048	18.9871	Female-biased
FBgn0143863	0	41	13	122	359	0.0406574	0.251534	86.2916	0	Male_specific
FBgn0142443	8	80	17	60	702	0.028543	0.251429	1.62222	3.40848	Female-biased
FBgn0144324	2	275	33	617	2003	0.000570955	0.251153	11.8387	42.3184	Female-biased
FBgn0135775	5	230	20	280	1054	0.013435	0.25098	6.90636	12.2829	Unbiased
FBgn0146967	2	97	20	187	814	0.0164673	0.25064	108.394	92.2501	Unbiased
FBgn0137793	2	165	24	339	973	0.00786146	0.250458	27.2523	21.4926	Unbiased
FBgn0137976	13	243	39	243	1082	0.000667781	0.25	3.20982	28.0735	Female-biased
FBgn0146718	3	76	15	107	434	0.0445072	0.248634	36.2075	60.024	Unbiased
FBgn0138972	0	37	15	112	1450	0.0240296	0.248322	10.4342	11.1213	Unbiased
FBgn0145064	22	280	44	203	841	0.000193575	0.246377	11.681	0.441267	Male-biased
FBgn0140625	2	54	21	108	385	0.0151455	0.246377	0.0709676	0	NA
FBgn0134520	10	165	38	198	676	0.00103419	0.246212	4.38575	0	Male_specific
FBgn0142696	10	241	33	263	1100	0.00216276	0.245616	7.72034	21.2227	Female-biased
FBgn0139406	4	122	44	249	1236	0.000199099	0.245508	31.3985	0.0143698	Male_specific
FBgn0139478	1	33	16	76	394	0.0398228	0.243929	16.3965	9.70622	Unbiased
FBgn0139025	0	49	21	152	687	0.00529596	0.243781	32.3129	22.3242	Unbiased
FBgn0135979	0	9	15	28	332	0.0456151	0.243243	6.17514	3.468	Unbiased
FBgn0135225	4	281	16	353	1157	0.03804	0.243218	151.732	0.731621	Male-biased
FBgn0147165	9	162	29	176	554	0.00545325	0.242448	33.5302	0.0123218	Male_specific
FBgn0143951	7	216	33	302	1223	0.00231858	0.241988	5.25153	21.7199	Female-biased
FBgn0145340	2	71	17	134	539	0.0391117	0.241078	5.48108	5.12752	Unbiased
FBgn0142298	3	135	46	312	1358	0.000150981	0.240789	27.3591	46.8951	Unbiased
FBgn0144342	11	540	53	770	3213	7.29667e-05	0.240339	8.84012	8.0274	Unbiased
FBgn0135477	14	382	27	276	923	0.00325527	0.239084	60.1473	0.0443156	Male_specific
FBgn0139161	3	160	20	274	1093	0.0237995	0.238229	64.2613	49.1593	Unbiased
FBgn0136317	0	38	14	122	512	0.0418485	0.2375	16.2184	6.24896	Male-biased
FBgn0135763	1	47	18	115	491	0.0272201	0.237492	101.793	48.0818	Male-biased
FBgn0144998	0	28	18	90	431	0.023927	0.237288	1.01358	0.14553	Male_specific
FBgn0145757	9	231	13	127	404	0.0383349	0.23616	78.3642	0.0221013	Male_specific
FBgn0136130	9	268	19	213	770	0.0184995	0.235744	16.3522	46.7678	Female-biased
FBgn0140580	7	153	46	264	1066	0.000580157	0.234831	5.60372	40.5866	Female-biased
FBgn0136336	5	136	31	228	803	0.00537618	0.234737	8.9837	28.4142	Female-biased
FBgn0141208	3	137	26	269	953	0.00728861	0.23399	176.472	0.356455	Male-biased
FBgn0134235	3	51	20	89	796	0.0311842	0.233851	5.31804	7.49456	Unbiased
FBgn0133504	2	58	26	132	617	0.0110842	0.233835	19.2461	35.9373	Unbiased
FBgn0139044	5	199	26	305	975	0.012012	0.233551	30.9656	12.9191	Male-biased
FBgn0135252	0	59	15	194	604	0.0474889	0.233202	12.2708	27.2002	Female-biased
FBgn0138203	0	27	15	89	407	0.0398551	0.232759	25.0187	44.1351	Unbiased
FBgn0138694	0	33	14	109	643	0.042039	0.232394	6.16954	35.9667	Female-biased
FBgn0143996	5	119	16	134	548	0.0427217	0.23226	6.19212	4.14706	Unbiased
FBgn0138868	2	116	38	297	1282	0.000578517	0.230872	13.8135	23.2418	Unbiased
FBgn0133866	22	686	53	624	2020	0.000118093	0.230331	42.9035	21.8686	Unbiased
FBgn0138846	6	402	19	453	1173	0.0251532	0.230175	10.6486	22.7107	Female-biased
FBgn0143802	0	23	16	77	485	0.0388581	0.23	18.6199	11.2567	Unbiased
FBgn0142026	1	63	18	160	688	0.0295039	0.22988	3.99262	5.45179	Unbiased
FBgn0133333	2	67	17	133	525	0.0408798	0.229737	3.26402	3.05162	Unbiased
FBgn0142543	3	81	20	144	487	0.0353497	0.229565	18.4737	26.673	Unbiased
FBgn0134554	2	91	20	193	674	0.0283499	0.229513	18.644	47.8534	Female-biased
FBgn0136951	0	60	22	202	767	0.00592986	0.229008	56.7511	12.8538	Male-biased
FBgn0138642	6	337	100	844	4441	1.52075e-08	0.228748	14.6468	10.6932	Unbiased
FBgn0134451	0	21	15	71	261	0.0387214	0.228261	135.095	1.05147	Male-biased
FBgn0140799	3	62	17	102	773	0.0492374	0.228049	0.493927	0.976165	NA
FBgn0141977	1	53	18	136	490	0.0292137	0.227792	37.5939	55.6598	Unbiased
FBgn0143399	2	126	36	324	1000	0.000961252	0.227368	65.5139	22.0334	Male-biased
FBgn0280583	6	77	19	88	276	0.0498728	0.226667	0	0	NA
FBgn0140108	2	65	30	160	586	0.00465302	0.226389	173.425	0.0507069	Male_specific
FBgn0142654	7	224	71	485	1858	1.01645e-05	0.226194	16.1744	10.2408	Unbiased
FBgn0144158	3	79	26	161	612	0.0106053	0.225718	16.0071	45.9719	Female-biased
FBgn0141670	4	116	18	169	631	0.041723	0.225199	15.6872	74.9199	Female-biased
FBgn0135300	0	34	18	117	432	0.0255006	0.225166	4.40752	38.6629	Female-biased
FBgn0147151	1	48	27	136	590	0.00688844	0.225155	49.1264	81.7759	Unbiased
FBgn0135448	6	174	22	222	698	0.0279261	0.225108	2.51896	1.07061	Male-biased
FBgn0141662	0	45	15	155	580	0.0446624	0.225	15.8073	99.1949	Female-biased
FBgn0134612	1	41	18	107	379	0.0458773	0.224395	61.4868	0.0760384	Male_specific
FBgn0136691	3	142	29	305	1079	0.00838217	0.223923	4.61393	2.83352	Unbiased
FBgn0143396	14	470	46	558	1986	0.000717339	0.223865	36.4384	52.4657	Unbiased
FBgn0137447	2	211	66	626	2987	2.1525e-06	0.222679	2.57006	8.1345	Female-biased
FBgn0134283	13	283	78	492	1853	1.14659e-05	0.222304	7.30906	17.3273	Female-biased
FBgn0144193	5	110	47	236	905	0.000525258	0.221765	80.7059	51.5841	Unbiased
FBgn0135443	0	43	19	151	594	0.0158903	0.221649	4.47065	6.37953	Unbiased
FBgn0147534	3	179	41	439	1492	0.000725717	0.221462	22.4768	46.0102	Female-biased
FBgn0135029	1	48	17	126	444	0.0465521	0.220307	120.758	25.9606	Male-biased
FBgn0140985	5	81	19	108	382	0.0466805	0.220238	0.0557217	0.0753976	NA
FBgn0145967	4	116	23	199	799	0.0211315	0.220106	5.02881	5.14654	Unbiased
FBgn0135467	2	72	54	210	1096	7.02197e-05	0.219605	2.29097	1.1888	Unbiased
FBgn0132823	3	171	29	376	1200	0.00871883	0.218864	16.2769	29.4848	Unbiased
FBgn0135652	4	75	21	123	559	0.0439021	0.218788	15.7144	40.3896	Female-biased
FBgn0147043	2	34	24	81	442	0.0238411	0.218729	1.95924	0.359727	Male-biased
FBgn0145968	3	66	23	132	533	0.0239877	0.217949	22.2759	16.8178	Unbiased
FBgn0064059	8	176	56	338	1329	0.000304658	0.217412	10.2511	8.04466	Unbiased
FBgn0136759	0	30	19	108	336	0.0253405	0.217391	95.883	0	Male_specific
FBgn0139934	13	311	17	167	593	0.0192825	0.217294	13.274	0.0527681	Male_specific
FBgn0139966	1	56	27	166	695	0.00755	0.216538	9.13099	22.9094	Female-biased
FBgn0145290	2	108	21	249	936	0.0309027	0.215564	8.29803	15.3259	Unbiased
FBgn0142745	0	73	31	266	1157	0.00146116	0.215339	77.4268	0.176549	Male_specific
FBgn0135509	5	294	133	876	4339	7.58459e-11	0.21505	19.374	0.100459	Male_specific
FBgn0142275	0	21	20	77	535	0.0221104	0.214286	18.5298	7.94178	Male-biased
FBgn0141499	7	158	23	195	659	0.0331151	0.214259	16.84	37.6253	Female-biased
FBgn0140587	16	308	22	177	530	0.0141039	0.213999	3.85338	0.715187	Male-biased
FBgn0145580	6	125	35	223	916	0.00519926	0.212854	6.40685	8.83557	Unbiased
FBgn0136597	32	847	46	513	1545	0.000288067	0.212538	9.14653	0.0263019	Male_specific
FBgn0144808	4	108	20	177	976	0.0457867	0.212281	12.7404	34.0132	Female-biased
FBgn0141132	0	45	21	167	577	0.0169425	0.212264	14.6083	8.78383	Unbiased
FBgn0144735	2	108	38	304	1175	0.00161973	0.212136	5.91082	19.3636	Female-biased
FBgn0135266	1	55	18	153	527	0.0493421	0.211791	92.8125	120.709	Unbiased
FBgn0135423	1	45	21	130	552	0.0302128	0.211688	3.41066	2.72758	Unbiased
FBgn0141908	3	86	29	196	1175	0.0119614	0.211215	31.4133	11.5757	Male-biased
FBgn0138842	19	570	48	583	1896	0.000948962	0.21078	4.82548	12.9481	Female-biased
FBgn0147079	4	131	45	317	1590	0.00107368	0.210778	2.83346	1.10364	Male-biased
FBgn0143530	9	206	49	357	1279	0.00123789	0.210725	23.1446	29.9211	Unbiased
FBgn0134773	2	161	42	469	1733	0.000781692	0.210101	220.656	0.0545076	Male_specific
FBgn0145345	0	34	19	128	777	0.026459	0.209877	17.721	10.711	Unbiased
FBgn0141523	0	30	22	113	595	0.0149045	0.20979	11.914	37.8302	Female-biased
FBgn0138305	3	93	24	197	1218	0.0270485	0.209579	9.58589	0.0827262	Male_specific
FBgn0141724	2	75	21	178	794	0.0303422	0.209486	2.47568	0.21887	Male-biased
FBgn0141114	2	104	47	314	1379	0.000441598	0.207988	5.43884	12.4823	Female-biased
FBgn0141085	3	74	25	161	664	0.0264675	0.207751	0.186714	0.0871674	NA
FBgn0146939	13	217	48	299	1766	0.00144301	0.207428	27.5232	21.0352	Unbiased
FBgn0145056	1	77	35	251	987	0.00215719	0.206978	6.07034	27.3621	Female-biased
FBgn0141704	14	285	45	357	1449	0.00226861	0.206637	16.5556	13.2554	Unbiased
FBgn0142892	8	199	32	291	1011	0.0109292	0.206122	21.1277	32.4255	Unbiased
FBgn0141439	11	427	27	435	1006	0.0131333	0.205886	11.1532	13.6501	Unbiased
FBgn0142055	4	164	19	268	945	0.0483275	0.205717	7.40024	10.6323	Unbiased
FBgn0143112	14	646	47	839	3285	0.00138019	0.205509	26.1288	27.4531	Unbiased
FBgn0143624	1	40	23	122	631	0.0313427	0.205247	32.2339	6.07235	Male-biased
FBgn0133978	0	47	16	182	693	0.0470657	0.20524	1.75972	22.1954	Female-biased
FBgn0142612	1	75	38	250	837	0.00134314	0.205128	46.9946	22.9529	Male-biased
FBgn0144142	12	357	14	179	511	0.036267	0.204506	20.2473	0.0141479	Male_specific
FBgn0139808	5	139	39	298	1207	0.00505507	0.204441	27.293	30.2636	Unbiased
FBgn0137418	3	138	23	294	936	0.0286984	0.20406	15.0222	64.7635	Female-biased
FBgn0136388	0	37	22	145	462	0.0163421	0.203297	62.2074	1.29877	Male-biased
FBgn0142002	3	77	30	185	821	0.0121605	0.202984	54.7128	34.7083	Unbiased
FBgn0146061	16	396	39	406	1516	0.00486092	0.202856	30.5375	7.46756	Male-biased
FBgn0143959	2	47	24	121	826	0.0283947	0.202839	12.7641	10.1139	Unbiased
FBgn0144774	3	149	47	418	1962	0.000880316	0.202787	125.378	295.77	Female-biased
FBgn0137403	22	319	32	204	655	0.00539423	0.202535	45.1007	6.21582	Male-biased
FBgn0134853	13	120	26	104	413	0.0238471	0.202381	7.9211	0.399506	Male-biased
FBgn0145965	0	37	16	147	522	0.0464846	0.201087	10.3548	20.5153	Unbiased
FBgn0141447	0	43	22	171	930	0.0172277	0.200935	9.18225	27.1276	Female-biased
FBgn0140582	0	23	17	93	460	0.042805	0.198276	7.6287	2.15945	Male-biased
FBgn0138624	0	45	16	182	477	0.0480314	0.198238	20.7463	17.0925	Unbiased
FBgn0147323	30	526	47	370	1491	0.00108401	0.197443	12.5722	15.8424	Unbiased
FBgn0145262	3	112	31	282	1057	0.0141304	0.196029	17.9138	34.3062	Unbiased
FBgn0140559	1	83	23	267	878	0.022737	0.195476	16.2402	43.3416	Female-biased
FBgn0143684	2	75	21	191	679	0.0485131	0.194998	9.45734	51.6716	Female-biased
FBgn0132981	0	31	19	128	599	0.0480922	0.194969	62.0273	72.2283	Unbiased
FBgn0143956	1	86	26	285	1182	0.0147212	0.194769	47.2621	46.3543	Unbiased
FBgn0140558	8	160	38	274	961	0.0087941	0.194751	3.26224	6.91139	Female-biased
FBgn0141631	11	511	36	681	2000	0.00976296	0.194649	12.5317	11.0085	Unbiased
FBgn0145529	0	46	23	191	652	0.0182776	0.194093	14.1565	14.5081	Unbiased
FBgn0138186	18	684	36	613	1868	0.00538269	0.194038	26.7363	31.1496	Unbiased
FBgn0084893	17	362	20	192	540	0.0211872	0.19397	152.389	0.0335782	Male_specific
FBgn0140730	10	163	44	268	1044	0.00619469	0.193005	6.01178	42.6135	Female-biased
FBgn0136594	5	72	28	137	571	0.0275955	0.192982	0	0	NA
FBgn0139761	7	188	60	447	1790	0.000498255	0.191585	30.3133	11.1484	Male-biased
FBgn0146088	0	31	18	131	636	0.0458227	0.191358	108.676	2.45461	Male-biased
FBgn0136747	1	63	28	216	1030	0.0142687	0.191324	3.3753	50.7937	Female-biased
FBgn0134444	6	116	27	195	906	0.034479	0.191172	7.50431	26.5994	Female-biased
FBgn0146096	0	29	26	123	733	0.0091858	0.190789	5.52418	1.90595	Male-biased
FBgn0144025	5	241	28	464	1727	0.0232296	0.190329	14.1334	26.7421	Unbiased
FBgn0144384	0	65	25	277	1432	0.0118994	0.190058	18.576	16.6496	Unbiased
FBgn0143961	1	79	21	257	1191	0.0359303	0.189665	77.1159	174.089	Female-biased
FBgn0141094	13	255	20	182	549	0.0439796	0.189585	9.95127	0	Male_specific
FBgn0139880	2	81	21	212	733	0.0499794	0.189494	3.57924	14.3106	Female-biased
FBgn0142839	2	58	24	160	692	0.0320736	0.189132	7.39145	113.505	Female-biased
FBgn0134443	1	35	20	113	893	0.0494082	0.188867	13.6061	20.0151	Unbiased
FBgn0145075	7	100	29	161	927	0.0272331	0.188697	122.257	22.9403	Male-biased
FBgn0147073	4	122	34	294	1672	0.0129984	0.188006	5.59696	17.8665	Female-biased
FBgn0133138	4	57	27	123	580	0.0334882	0.187634	72.9271	67.832	Unbiased
FBgn0144955	5	124	27	237	1062	0.0312328	0.18724	70.8266	17.7269	Male-biased
FBgn0141113	3	107	39	307	1395	0.00445098	0.187026	8.25391	32.2248	Female-biased
FBgn0140691	5	85	28	167	796	0.0299871	0.185786	10.2394	16.7173	Unbiased
FBgn0147561	1	30	27	107	994	0.0304715	0.183264	5.98691	3.09597	Unbiased
FBgn0136037	4	100	26	216	1046	0.0378727	0.183122	4.0118	3.93813	Unbiased
FBgn0143948	1	50	28	180	761	0.0227432	0.182909	49.6605	55.7609	Unbiased
FBgn0140488	2	41	33	130	668	0.01242	0.182623	17.7038	21.129	Unbiased
FBgn0141723	2	55	26	162	722	0.03238	0.182028	1.62218	0.211839	Male-biased
FBgn0139162	4	104	31	247	1178	0.028096	0.182011	5.59604	12.745	Female-biased
FBgn0141654	2	50	30	155	897	0.0207347	0.181402	30.1145	19.949	Unbiased
FBgn0135529	7	184	32	326	1204	0.0230377	0.181297	1.70816	8.06263	Female-biased
FBgn0139063	0	59	37	267	1393	0.00160764	0.180982	6.94027	9.42067	Unbiased
FBgn0147054	7	113	46	252	1031	0.00864453	0.177514	36.7433	72.3385	Unbiased
FBgn0140524	3	43	32	121	565	0.0265443	0.176481	22.1912	5.94863	Male-biased
FBgn0141861	2	79	40	274	1507	0.00448955	0.176177	6.96576	14.364	Female-biased
FBgn0138440	10	241	54	485	1886	0.00310907	0.175706	12.1375	21.5117	Unbiased
FBgn0144934	0	79	34	371	1598	0.00300283	0.175556	6.47474	16.5739	Female-biased
FBgn0143749	3	75	59	260	1177	0.000754519	0.175494	7.01958	28.3527	Female-biased
FBgn0140173	18	341	30	279	845	0.0236614	0.175	53.6859	0.0164454	Male_specific
FBgn0136009	1	85	62	361	1641	0.000101918	0.17471	9.4429	13.0392	Unbiased
FBgn0144435	13	363	62	682	2623	0.00150222	0.174035	18.435	15.3148	Unbiased
FBgn0133625	15	162	80	328	2303	0.000593137	0.172718	1.27252	1.02888	Unbiased
FBgn0136010	0	15	21	72	385	0.0393613	0.172414	5.9633	19.4968	Female-biased
FBgn0133823	3	113	29	312	1401	0.0339061	0.172132	1.86299	3.48936	Unbiased
FBgn0135811	2	48	45	176	1034	0.00356597	0.171733	62.2926	34.0693	Unbiased
FBgn0139607	13	185	52	313	1797	0.00575408	0.171486	2.05092	2.0658	Unbiased
FBgn0137049	16	132	31	126	466	0.038679	0.171202	24.8802	0	Male_specific
FBgn0136345	0	19	21	92	491	0.0421621	0.171171	2.48374	0.390841	Male-biased
FBgn0133199	2	71	55	274	1439	0.000744261	0.170709	48.8107	22.8275	Male-biased
FBgn0134376	4	87	32	222	1021	0.0279936	0.170442	26.2134	29.9735	Unbiased
FBgn0143766	0	77	39	377	1598	0.00194444	0.169604	13.0914	17.7052	Unbiased
FBgn0142379	11	271	30	348	1411	0.0348645	0.16951	33.3008	21.9411	Unbiased
FBgn0137925	4	85	43	250	1221	0.00928206	0.168625	2.88768	12.5191	Female-biased
FBgn0141689	6	129	72	399	1904	0.000422234	0.167395	24.6753	25.5494	Unbiased
FBgn0147158	3	58	44	193	1047	0.00934163	0.167246	21.4188	11.919	Unbiased
FBgn0135236	4	91	38	256	1244	0.0209549	0.16701	21.9478	42.2751	Unbiased
FBgn0138749	33	1048	45	729	1905	0.00460417	0.166681	0.355815	0.237368	NA
FBgn0147329	17	266	34	267	1010	0.0275264	0.165729	2.63735	0.335939	Male-biased
FBgn0143555	4	116	48	363	1383	0.00489607	0.165248	1.48675	14.5136	Female-biased
FBgn0140310	21	238	26	151	498	0.0400732	0.165017	79.1414	0.0181609	Male_specific
FBgn0137257	3	120	29	344	1514	0.0351921	0.164871	48.2091	79.0468	Unbiased
FBgn0139826	5	80	42	216	921	0.0170976	0.163887	5.97119	8.47509	Unbiased
FBgn0145198	17	146	42	177	544	0.0218602	0.163877	440.422	280.939	Unbiased
FBgn0142242	15	232	30	235	973	0.0421382	0.163455	5.0274	6.84948	Unbiased
FBgn0136574	6	109	67	336	1708	0.00125851	0.162752	13.1547	0.131614	Male_specific
FBgn0134557	0	27	23	139	629	0.0498257	0.162651	9.11989	20.5587	Female-biased
FBgn0132977	1	44	29	181	1348	0.0375238	0.162222	32.8706	105.315	Female-biased
FBgn0141213	3	60	57	223	1136	0.00172917	0.162014	0.264508	0.074115	NA
FBgn0134260	4	72	33	196	988	0.0412463	0.160549	9.84208	6.78669	Unbiased
FBgn0140124	0	46	43	241	1110	0.00156696	0.160279	18.408	3.87049	Male-biased
FBgn0145952	6	162	74	527	2178	0.000517979	0.160123	6.14864	7.35412	Unbiased
FBgn0146563	2	158	48	637	2116	0.00265326	0.158742	5.27937	13.1503	Female-biased
FBgn0144327	4	145	38	426	2156	0.0237007	0.158702	32.5843	41.1539	Unbiased
FBgn0133317	7	239	34	489	2324	0.0385348	0.157565	8.21074	21.1404	Female-biased
FBgn0140536	2	59	35	220	1197	0.0246672	0.157415	18.9197	6.50769	Male-biased
FBgn0142343	6	109	36	255	1115	0.0450312	0.156593	19.9259	10.9074	Unbiased
FBgn0135393	1	33	29	141	616	0.0336054	0.156322	300.841	190.885	Unbiased
FBgn0146729	15	242	101	606	2123	0.000202387	0.156067	3.24019	17.168	Female-biased
FBgn0144093	121	2567	164	1879	4414	6.84506e-07	0.152812	42.8983	5.22296	Male-biased
FBgn0140136	3	58	32	186	719	0.0481732	0.151991	2.29424	2.38431	Unbiased
FBgn0144290	1	48	34	218	864	0.0252445	0.15188	4.42175	11.3034	Female-biased
FBgn0133862	0	35	25	198	1342	0.0316576	0.150215	8.83608	15.7653	Unbiased
FBgn0137431	5	272	84	1046	3994	0.000168638	0.150194	11.294	0.0147548	Male_specific
FBgn0141339	3	80	40	284	1496	0.025671	0.150013	8.10664	8.61736	Unbiased
FBgn0140723	20	309	53	420	2088	0.0127209	0.149896	30.86	24.7568	Unbiased
FBgn0141527	35	546	68	576	2164	0.00517648	0.146825	11.5106	30.8513	Female-biased
FBgn0084805	2	83	39	342	1509	0.0185524	0.146514	1.67989	0.645277	Male-biased
FBgn0133283	3	104	35	358	1553	0.0381906	0.146161	8.54408	9.93376	Unbiased
FBgn0144806	6	111	39	287	1379	0.0480773	0.145561	8.10306	8.22145	Unbiased
FBgn0141762	5	75	52	247	1207	0.0129955	0.1452	19.076	18.8221	Unbiased
FBgn0141931	1	52	43	260	1420	0.010859	0.143939	18.2669	24.8486	Unbiased
FBgn0135893	22	258	60	370	1585	0.0158506	0.142535	1.61798	0.585113	Male-biased
FBgn0144041	18	486	45	652	2121	0.0350981	0.141351	12.2184	14.4775	Unbiased
FBgn0147365	2	71	38	305	1426	0.0275741	0.13883	21.3417	20.0248	Unbiased
FBgn0147149	1	35	33	176	815	0.0365416	0.136465	16.3482	18.5571	Unbiased
FBgn0144560	1	43	48	232	1315	0.00624902	0.135955	0.700151	0.243852	NA
FBgn0140748	1	24	37	124	781	0.0310821	0.135846	14.8173	26.8131	Unbiased
FBgn0134876	2	39	53	189	1332	0.00940329	0.134689	1.07881	0.479675	Male-biased
FBgn0139923	2	52	40	235	979	0.0259829	0.133566	189.211	71.5104	Male-biased
FBgn0141098	31	570	63	664	2337	0.0134331	0.132125	9.3635	18.0646	Unbiased
FBgn0144802	5	86	48	294	1482	0.0297762	0.131976	15.4215	16.5088	Unbiased
FBgn0142721	13	184	47	346	1428	0.04379	0.130503	14.7658	35.6079	Female-biased
FBgn0141534	65	1055	80	772	2570	0.00298067	0.129174	5.60355	11.6447	Female-biased
FBgn0147216	0	20	29	135	980	0.0471476	0.129032	2.50622	0.90482	Male-biased
FBgn0140668	1	105	91	647	2715	7.44104e-05	0.128758	28.0198	0.00258749	Male_specific
FBgn0147464	10	342	115	1304	5003	0.000268707	0.127776	8.99306	0.0245236	Male_specific
FBgn0140795	17	307	94	803	2566	0.00460888	0.123423	2.91306	7.25774	Female-biased
FBgn0146915	13	245	72	646	2977	0.0142031	0.122031	3.75618	6.84081	Unbiased
FBgn0137514	1	47	38	277	1150	0.0422697	0.119421	67.9925	4.77907	Male-biased
FBgn0134333	3	84	56	410	1672	0.013691	0.119193	22.3823	15.7419	Unbiased
FBgn0134399	13	159	55	354	2266	0.0478078	0.118765	19.9689	9.90783	Male-biased
FBgn0143173	8	150	58	476	1822	0.0304204	0.118404	42.6393	18.8814	Male-biased
FBgn0143170	21	218	60	360	1384	0.0477905	0.117903	5.62207	26.6884	Female-biased
FBgn0133559	33	583	98	998	3721	0.00780894	0.116846	40.0367	8.45088	Male-biased
FBgn0143791	57	846	75	701	2071	0.0138161	0.115047	21.3727	12.5903	Unbiased
FBgn0280287	0	18	36	139	672	0.0274532	0.11465	13.7418	5.48816	Male-biased
FBgn0136386	43	547	56	452	1927	0.0345476	0.113204	8.44733	20.3668	Female-biased
FBgn0135145	1	30	45	193	936	0.0385222	0.11279	22.0569	32.9747	Unbiased
FBgn0134336	111	802	130	598	1740	0.00154625	0.112276	67.6184	41.5951	Unbiased
FBgn0147203	3	118	69	661	2999	0.00754017	0.10981	4.15237	1.43581	Male-biased
FBgn0142688	19	212	80	494	2087	0.0245651	0.108364	0.151802	0.0221209	NA
FBgn0144421	1	50	67	359	1925	0.00486305	0.107544	2.70997	3.09227	Unbiased
FBgn0140040	2	33	50	197	1254	0.0369315	0.105017	2.97318	1.72738	Unbiased
FBgn0143772	15	143	110	493	2930	0.00773645	0.104843	2.39961	9.82793	Female-biased
FBgn0134061	4	82	63	419	1764	0.0279361	0.103971	14.436	51.275	Female-biased
FBgn0139099	22	604	106	1587	5340	0.0101534	0.103798	17.7597	13.142	Unbiased
FBgn0144392	6	69	67	305	1528	0.0386103	0.1023	3.99526	5.88055	Unbiased
FBgn0137991	3	97	59	547	2018	0.0224738	0.102234	10.884	19.3764	Unbiased
FBgn0142623	0	35	63	335	2268	0.00497229	0.0945946	2.63803	0.915146	Male-biased
FBgn0134408	6	73	73	356	1743	0.041167	0.0942138	20.7153	23.047	Unbiased
FBgn0146039	4	81	64	451	2137	0.0408765	0.0934321	5.69727	11.4731	Female-biased
FBgn0145832	9	149	84	636	2990	0.0312175	0.0930347	10.2003	14.2272	Unbiased
FBgn0133868	25	318	163	1123	4335	0.00560691	0.0877014	20.1378	21.9339	Unbiased
FBgn0134500	2	36	59	265	1236	0.0410029	0.0868144	15.0965	0.129316	Male_specific
FBgn0139581	8	121	92	610	2635	0.0266844	0.0855267	6.4993	16.2752	Female-biased
FBgn0135848	25	269	131	832	3834	0.0200184	0.0840669	4.01209	2.60273	Unbiased
FBgn0134033	41	343	125	697	2864	0.038786	0.0828197	6.75765	11.3226	Unbiased
FBgn0139054	10	254	95	1186	5002	0.0315465	0.0811508	2.31656	5.78714	Female-biased
FBgn0141235	0	36	75	415	1756	0.00534138	0.0798226	4.46364	3.65186	Unbiased
FBgn0141228	1	30	67	299	1753	0.0265556	0.0764795	16.3092	12.6889	Unbiased
FBgn0135598	10	127	141	784	4288	0.012249	0.0731821	24.8529	17.779	Unbiased
FBgn0134710	3	62	78	518	2290	0.0467862	0.0698595	18.2783	9.62667	Unbiased
FBgn0145874	2	36	81	358	2418	0.0430512	0.0672742	11.7933	15.1004	Unbiased
FBgn0138117	15	232	128	1123	5210	0.0437063	0.0663226	5.26595	1.83607	Male-biased
FBgn0135665	4	64	99	554	2857	0.0432838	0.0647249	18.9277	20.8314	Unbiased
FBgn0139774	34	321	167	1061	5356	0.0465175	0.0631178	5.59407	5.9453	Unbiased
FBgn0139950	59	266	83	547	2471	0.0440067	-0.0883097	10.2482	6.41942	Unbiased
FBgn0142081	4	9	22	257	1202	0.0204231	-0.120012	0.445173	0.12211	NA
FBgn0137964	65	380	24	250	804	0.0262655	-0.127162	3.6307	1.30377	Male-biased
FBgn0136964	35	137	39	274	918	0.0247676	-0.13964	2.63665	9.46664	Female-biased
FBgn0144690	45	235	60	593	2137	0.00317557	-0.144755	5.49506	13.6849	Female-biased
FBgn0146330	19	83	30	269	1349	0.0342083	-0.15196	6.80148	3.9436	Unbiased
FBgn0147302	11	34	24	178	783	0.035365	-0.153908	17.2264	10.2526	Unbiased
FBgn0140244	17	106	24	303	1112	0.0424943	-0.155465	3.04396	50.1917	Female-biased
FBgn0145581	10	69	20	321	1211	0.049435	-0.15641	12.3429	24.614	Unbiased
FBgn0143760	12	45	25	225	834	0.0393848	-0.157658	3.74551	28.9704	Female-biased
FBgn0132918	20	125	28	363	1266	0.0255972	-0.160519	1.53578	1.03209	Unbiased
FBgn0138915	12	66	20	243	1377	0.0470605	-0.161408	1.91022	0.656388	Male-biased
FBgn0146867	4	17	12	198	617	0.0447591	-0.17093	5.69008	16.3303	Female-biased
FBgn0137140	31	142	24	220	871	0.0188292	-0.171371	0.0176663	0	NA
FBgn0136089	13	62	22	250	1009	0.02844	-0.172711	18.7846	28.2661	Unbiased
FBgn0147207	10	57	18	261	933	0.0416547	-0.177898	0.0755222	20.5586	NA
FBgn0144856	3	5	10	108	533	0.0358785	-0.186521	2.59946	0.969888	Male-biased
FBgn0134887	21	201	12	248	1035	0.0457486	-0.188702	0.301482	0.160008	NA
FBgn0137276	4	22	10	220	837	0.0415218	-0.194805	10.8802	32.309	Female-biased
FBgn0140177	11	28	18	131	503	0.022656	-0.20321	8.09575	10.345	Unbiased
FBgn0135507	12	40	18	164	1096	0.0180103	-0.203922	1.86693	1.45712	Unbiased
FBgn0138146	2	1	7	78	427	0.0266822	-0.209564	55.8013	28.0134	Unbiased
FBgn0142060	10	26	17	140	547	0.0145654	-0.213744	2.7896	1.27998	Male-biased
FBgn0133035	17	153	8	185	513	0.0367383	-0.227337	3.02143	1.95325	Unbiased
FBgn0135090	6	18	11	133	469	0.019086	-0.233736	5.20984	3.48378	Unbiased
FBgn0147258	10	34	13	137	578	0.016855	-0.235952	5.84615	11.3847	Unbiased
FBgn0135662	20	115	13	199	845	0.0086907	-0.239819	18.7918	28.2179	Unbiased
FBgn0144729	14	49	10	94	388	0.0387718	-0.240676	0.341874	0	NA
FBgn0136638	10	50	9	128	464	0.0360223	-0.245417	0.448699	0.301463	NA
FBgn0136050	8	35	11	168	582	0.0148701	-0.248639	0.957972	0.882372	Unbiased
FBgn0133512	9	29	8	77	324	0.0473786	-0.255827	25.4655	34.9258	Unbiased
FBgn0280625	13	43	14	149	468	0.00808496	-0.257523	1.59378	0.0703751	Male_specific
FBgn0140690	6	15	10	114	409	0.0139057	-0.258721	24.9931	16.3744	Unbiased
FBgn0146841	26	115	14	179	641	0.00328906	-0.258844	0.490525	0.0206543	NA
FBgn0136525	3	4	7	97	386	0.0154943	-0.260396	16.1723	25.0739	Unbiased
FBgn0143280	13	22	20	144	1259	0.00090007	-0.261409	9.59637	6.76445	Unbiased
FBgn0142045	12	42	7	72	671	0.0427594	-0.263158	1.61988	0.451657	Male-biased
FBgn0146999	5	37	6	167	607	0.0416307	-0.273173	12.353	67.4169	Female-biased
FBgn0137096	13	186	2	132	384	0.0320026	-0.281761	0.452311	0.185658	NA
FBgn0145266	9	53	5	98	492	0.0427901	-0.291864	4.38741	0.715803	Male-biased
FBgn0137650	10	47	13	282	1223	0.00121385	-0.291925	6.4102	17.7175	Female-biased
FBgn0140111	15	154	2	109	288	0.0191522	-0.296802	198.359	0.19535	Male_specific
FBgn0133121	16	36	16	145	653	0.00062566	-0.301105	118.177	99.2276	Unbiased
FBgn0141638	13	47	7	88	318	0.0134394	-0.301852	0.0343821	0	NA
FBgn0138932	12	33	11	119	736	0.00385106	-0.304634	4.39072	6.3303	Unbiased
FBgn0146761	9	67	6	160	570	0.0203711	-0.304846	6.47854	37.4653	Female-biased
FBgn0143905	7	15	8	79	298	0.0119267	-0.307092	0.551622	0.565808	NA
FBgn0137802	11	97	3	106	324	0.0291922	-0.307882	2.38302	106.744	Female-biased
FBgn0147459	5	17	5	74	223	0.0374818	-0.313187	0.0434124	0	NA
FBgn0132876	7	43	5	117	370	0.0414959	-0.314583	3.38817	66.5895	Female-biased
FBgn0145525	3	5	5	78	617	0.0207067	-0.314759	47.257	41.8199	Unbiased
FBgn0135613	10	40	7	108	423	0.0111268	-0.317965	25.9297	26.1656	Unbiased
FBgn0143353	7	55	4	118	421	0.0455398	-0.318445	7.28066	23.1478	Female-biased
FBgn0136850	6	66	5	226	1165	0.0246763	-0.319427	35.9344	97.1856	Female-biased
FBgn0137209	4	70	4	320	1231	0.0425743	-0.320513	4.74187	14.7967	Female-biased
FBgn0144259	3	11	4	94	405	0.0407678	-0.32381	34.1357	75.8725	Female-biased
FBgn0136463	7	29	4	64	250	0.0451934	-0.324536	62.9224	28.9067	Male-biased
FBgn0135558	3	12	4	105	493	0.037676	-0.326007	22.6558	0.0267853	Male_specific
FBgn0139542	5	24	4	82	304	0.0436398	-0.32914	34.2046	36.318	Unbiased
FBgn0145915	12	19	1	13	154	0.0378029	-0.329327	22.084	14.3319	Unbiased
FBgn0139822	6	15	6	73	281	0.0171685	-0.329545	4.68672	36.9512	Female-biased
FBgn0146599	2	0	4	78	405	0.00430293	-0.333333	3.78638	42.5853	Female-biased
FBgn0143482	9	57	5	130	497	0.0157048	-0.338044	5.13581	21.7181	Female-biased
FBgn0133602	4	14	5	129	450	0.0121507	-0.346542	166.865	2.63905	Male-biased
FBgn0135361	8	29	4	62	299	0.0256657	-0.347985	898.146	248.847	Male-biased
FBgn0144270	5	42	4	180	666	0.018826	-0.366366	8.06398	20.8147	Female-biased
FBgn0144069	10	390	3	585	2563	0.00936064	-0.369231	18.4016	48.5966	Female-biased
FBgn0140352	5	37	3	113	393	0.0315535	-0.378333	20.8986	33.3032	Unbiased
FBgn0138264	5	18	3	55	280	0.0379256	-0.378425	0.787151	0.299218	NA
FBgn0133146	8	36	2	50	252	0.0400761	-0.381395	4.28015	1.51444	Male-biased
FBgn0145695	5	12	5	90	367	0.00708093	-0.382353	104.246	6.35364	Male-biased
FBgn0140391	6	28	4	102	524	0.0136416	-0.384615	5.00231	3.12983	Unbiased
FBgn0145545	3	8	3	64	291	0.0337369	-0.388889	74.0941	48.2155	Unbiased
FBgn0140174	8	111	1	115	362	0.0356458	-0.397738	2.04273	1.25591	Unbiased
FBgn0142680	8	37	3	76	278	0.0171929	-0.399839	12.973	19.735	Unbiased
FBgn0145331	5	35	2	78	395	0.0404289	-0.404551	68.4839	40.9446	Unbiased
FBgn0134439	4	13	3	72	298	0.020413	-0.418487	52.6473	51.7264	Unbiased
FBgn0133657	8	100	1	115	414	0.0157511	-0.423773	29.3821	97.1719	Female-biased
FBgn0143997	2	5	2	61	201	0.0471733	-0.424242	2.90014	1.41028	Male-biased
FBgn0133051	4	35	2	110	412	0.0388901	-0.425287	15.3324	20.5104	Unbiased
FBgn0144749	6	31	1	41	135	0.0465423	-0.426587	29.1496	46.6161	Unbiased
FBgn0145239	7	247	3	673	3062	0.00577128	-0.431522	8.93462	5.63068	Unbiased
FBgn0139395	9	39	3	87	341	0.00370106	-0.440476	7.29291	11.2014	Unbiased
FBgn0143443	9	29	5	116	415	0.000875926	-0.442857	5.72637	3.24601	Unbiased
FBgn0140197	17	22	5	46	204	0.000373438	-0.449198	58.2	9.11809	Male-biased
FBgn0133507	4	14	3	108	435	0.00733525	-0.456674	7.45491	29.8865	Female-biased
FBgn0134625	15	72	1	78	251	0.000356954	-0.4575	290.852	0.0673066	Male_specific
FBgn0137822	5	44	1	74	197	0.0351587	-0.460452	234.468	0.0768808	Male_specific
FBgn0139518	4	23	2	89	361	0.0241293	-0.46131	9.1087	13.3776	Unbiased
FBgn0143023	5	26	3	136	517	0.00559212	-0.464506	14.2498	15.1413	Unbiased
FBgn0142479	4	34	1	70	533	0.049156	-0.473077	17.204	42.9925	Female-biased
FBgn0137083	3	35	2	263	868	0.0153072	-0.48255	3.99973	16.5948	Female-biased
FBgn0136768	4	114	1	247	930	0.0390258	-0.484211	27.6836	57.1229	Female-biased
FBgn0141598	5	21	1	40	126	0.029332	-0.489071	503.668	383.628	Unbiased
FBgn0140706	4	12	2	59	223	0.0152052	-0.497653	21.1113	32.3549	Unbiased
FBgn0139100	5	50	1	101	359	0.020326	-0.502208	2.12162	5.41134	Female-biased
FBgn0143195	6	23	0	24	129	0.0265541	-0.510638	118.41	51.1284	Male-biased
FBgn0147392	4	39	1	102	380	0.0265072	-0.523404	11.834	42.243	Female-biased
FBgn0137045	5	235	0	286	926	0.0193285	-0.548944	8.76434	45.9945	Female-biased
FBgn0145388	7	64	1	138	587	0.0023851	-0.558168	1.61222	1.94973	Unbiased
FBgn0136868	4	96	0	130	473	0.034523	-0.575221	9.98996	5.44567	Unbiased
FBgn0281674	2	17	1	179	619	0.0245413	-0.579932	8.94272	22.6177	Female-biased
FBgn0145187	10	22	2	73	311	7.62165e-05	-0.601754	15.7999	47.7435	Female-biased
FBgn0138984	5	170	0	266	1031	0.00950269	-0.610092	16.0617	19.2182	Unbiased
FBgn0141742	6	111	1	364	1664	0.00103772	-0.623459	0.829492	1.99174	Female-biased
FBgn0139247	5	43	1	169	547	0.00218119	-0.630503	1.37362	0.580039	Male-biased
FBgn0133368	3	86	0	162	588	0.0436093	-0.653226	19.8936	71.3428	Female-biased
FBgn0136227	3	8	1	92	364	0.003409	-0.67	34.9824	36.3907	Unbiased
FBgn0133607	6	43	1	212	802	0.000197595	-0.688515	91.3173	65.5397	Unbiased
FBgn0133958	3	66	0	150	562	0.030344	-0.694444	18.3518	47.0854	Female-biased
FBgn0145607	3	34	0	80	275	0.0298697	-0.701754	12.3795	47.7452	Female-biased
FBgn0137199	3	35	0	84	367	0.0285734	-0.705882	48.4446	50.0142	Unbiased
FBgn0145955	3	10	0	31	279	0.0215947	-0.756098	20.9511	31.4846	Unbiased
FBgn0137188	2	30	0	119	431	0.0437969	-0.798658	18.1586	27.7128	Unbiased
FBgn0145169	3	23	0	97	314	0.0085916	-0.808333	10.4522	40.9162	Female-biased
FBgn0136479	2	17	0	76	305	0.0382979	-0.817204	35.1279	48.3153	Unbiased
FBgn0144418	2	5	0	25	165	0.0423387	-0.833333	30.7993	26.4347	Unbiased
FBgn0144655	2	17	0	95	343	0.0265487	-0.848214	24.6348	52.6095	Female-biased
FBgn0141023	3	38	0	235	818	0.0030755	-0.860806	14.9456	236.898	Female-biased
FBgn0146182	2	8	0	58	233	0.0197542	-0.878788	23.4766	43.9936	Unbiased
FBgn0138251	2	8	0	66	218	0.0157895	-0.891892	15.7376	34.5956	Female-biased
FBgn0136923	3	24	0	218	876	0.00120813	-0.900826	21.6251	51.006	Female-biased
FBgn0280341	1	8	0	181	754	0.0473684	-0.957672	3.73248	3.2556	Unbiased
FBgn0146362	1	1	0	39	122	0.0487805	-0.975	296.728	0	Male_specific
FBgn0137902	1	1	0	52	247	0.037037	-0.981132	25.2501	85.1636	Female-biased
